# Supplementary material for: Non-linear association of atherogenic index of plasma with bone mineral density a cross-sectional study
Source: PubMed Central journal article supplement (PMC11167925; doi:10.1186/s12944-024-02180-3), 2024-06-12
Supplement: 12944_2024_2180_MOESM2_ESM.pdf [file 12944_2024_2180_MOESM2_ESM.pdf]

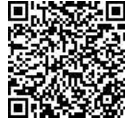

# National Center for Health Statistics

National Center for Health Statistics Home

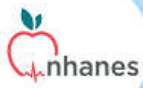

## National Health and Nutrition Examination Survey

### NCHS Ethics Review Board (ERB) Approval\*

| Survey Name/Date | NCHS IRB/ERB Protocol Number or Description                                                          |
|------------------|------------------------------------------------------------------------------------------------------|
| NHANES 2021-2022 | Protocol #2021-05                                                                                    |
| NHANES 2019-2020 | Protocol #2018-01                                                                                    |
| NHANES 2017-2018 | Protocol #2018-01 (Effective beginning October 26, 2017)                                             |
|                  | Continuation of Protocol #2011-17 (Effective through October 26, 2017)                               |
| NHANES 2015-2016 | Continuation of Protocol #2011-17                                                                    |
| NHANES 2013-2014 | Continuation of Protocol #2011-17                                                                    |
| NHANES 2011-2012 | Protocol #2011-17                                                                                    |
| NHANES 2009-2010 | Continuation of Protocol #2005-06                                                                    |
| NHANES 2007-2008 | Continuation of Protocol #2005-06                                                                    |
| NHANES 2005-2006 | Protocol #2005-06                                                                                    |
| NHANES 1999-2004 | Protocol #98-12                                                                                      |
| NHANES III       | Institutional Review Board (IRB) approval and documented consent was obtained from participants      |
| NHANES II        | Underwent internal human subjects review, but IRB approval using current standards was not obtained. |
| NHANES I         | Underwent internal human subjects review, but IRB approval using current standards was not obtained. |
| NHES             | Underwent internal human subjects review, but IRB approval using current standards was not obtained. |

\* In 2003, the NHANES Institutional Review Board (IRB) changed its name to the NCHS Research Ethics Review Board (ERB). In 2018, the name was changed from NCHS Research Ethics Review Board to NCHS Ethics Review Board.

Page last reviewed: August 24, 2022
